# Supplementary material
Source: PubMed Central journal article supplement (PMC7925379)
Supplement: NIHMS1650127-supplement-1.pdf [file NIHMS1650127-supplement-1.pdf]

## Supplementary Data

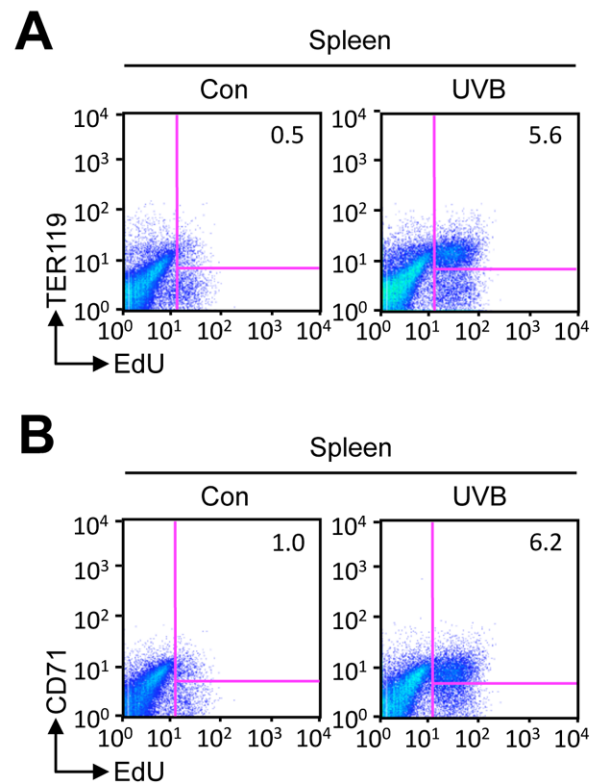

**Figure S1. Skin exposure to UVB induces splenic erythroid cell proliferation in mice.**

(A and B) Splenocytes prepared from C57BL/6 mice 4 days after their shaved back skin was exposed to UVB (50 mJ/cm<sup>2</sup>) were analyzed by antibody staining and flow cytometry. EdU was injected intraperitoneally 3 hours before splenocyte isolation. Splenocytes from control (Con) mice (shaved, unirradiated, and EdU-injected) were prepared and analyzed in parallel. Data are representative of two experiments.

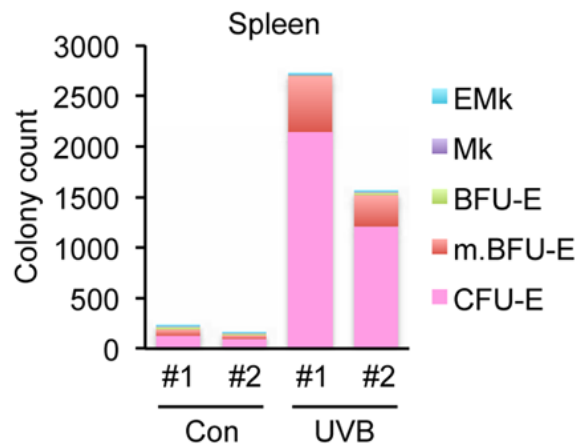

**Figure S2. Skin exposure to UVB results in expansion of splenic cell populations with erythroid colony-forming potential.**

Splenic nucleated cells prepared from C57BL/6 mice 4 days after their shaved back skin was exposed to UVB (50 mJ/cm<sup>2</sup>) were plated for the formation of erythroid-megakaryocyte (EMk), megakaryocyte (Mk), burst-forming unit-erythroid (BFU-E), mature BFU-E (m.BFU-E) and colony-forming unit-erythroid (CFU-E) colonies. Colony counts indicate numbers of colonies per  $5 \times 10^5$  plated cells for individual mice (#1 and #2) in each group. Data are representative of two experiments.

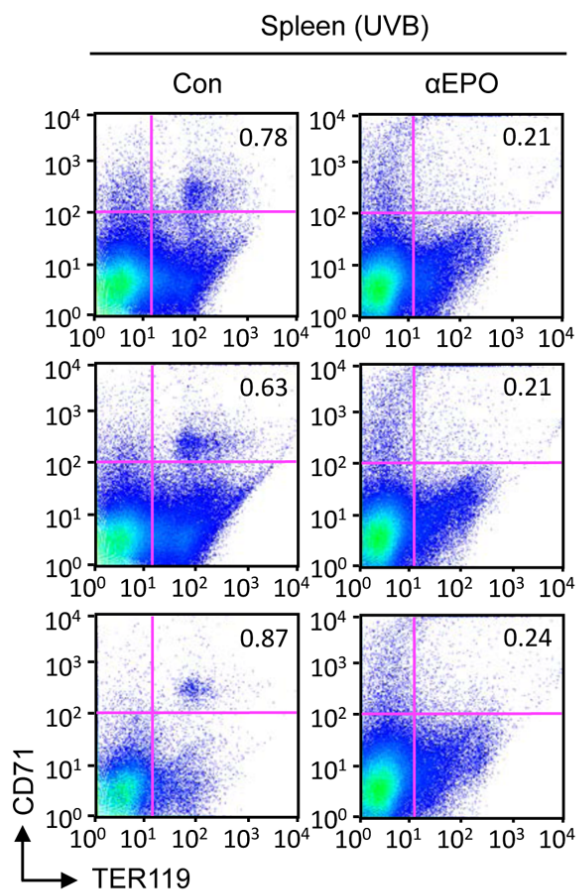

**Figure S3. Administration of an anti-EPO antibody prevents UVB-responsive splenic erythroid expansion.**

Splenocytes prepared from C57BL/6 mice 7 days after their shaved back skin was exposed to UVB (50 mJ/cm<sup>2</sup>) were analyzed by antibody staining and flow cytometry. An anti-EPO antibody and isotype-matched control (Con) immunoglobulin were administered to mice on d1, d3, and d5 after UVB irradiation. Data were obtained from one experiment.

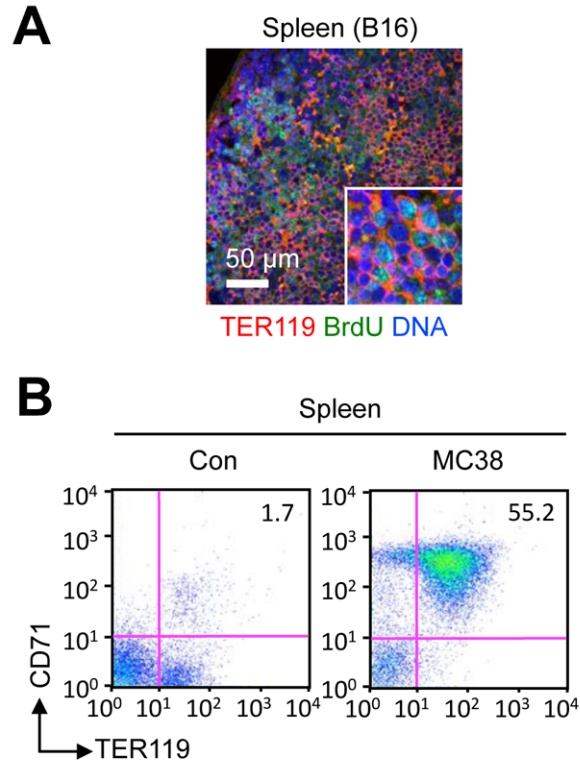

**Figure S4. Tumor growth induces splenic erythroid cell proliferation in mice.**

(A) The spleen of a mouse bearing subcutaneous B16 tumors of approximately 2,000 mm<sup>3</sup> in size was isolated 3 hours after intraperitoneal BrdU injection. A spleen section was analyzed by immunofluorescence along with DNA counterstaining. Data are representative of two experiments.

(B) Splenocytes prepared from a mouse bearing subcutaneous MC38 tumors of 2,000-2,500 mm<sup>3</sup> in size and a control (Con) mouse without tumor growth were analyzed by antibody staining and flow cytometry. Data are representative of three experiments.

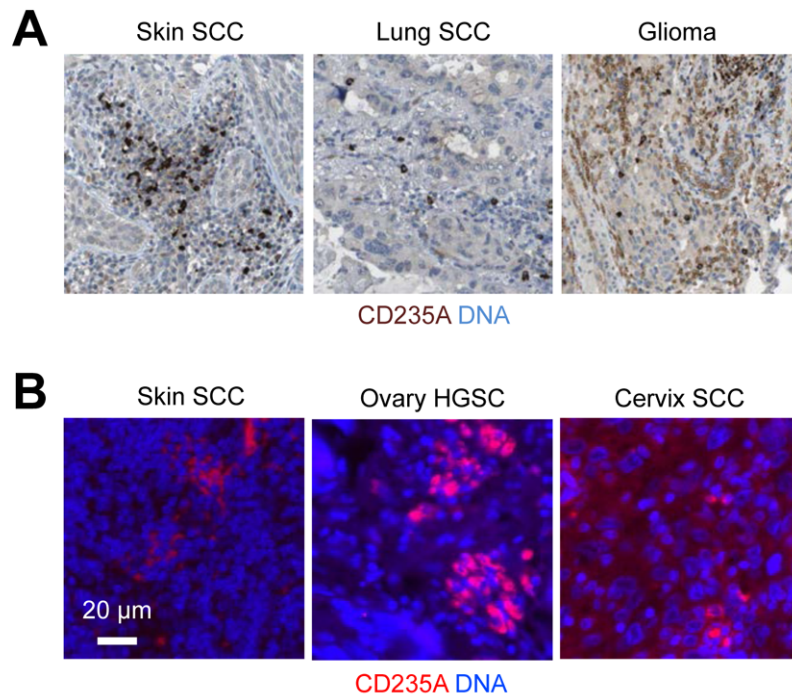

**Figure S5. CD235A immunostaining identifies tumor-associated erythroid cells in human cancer tissues.**

(A) Immunohistochemistry images from the Human Protein Atlas project reveal CD235A-expressing cells in human tumors.

(E) Human tumor sections were analyzed by immunofluorescence and DNA counterstaining.
